# A catalogue of imprinted genes and parent-of-origin effects in humans and animals

Ian M. Morison\* and Anthony E. Reeve

Cancer Genetics Laboratory, Department of Biochemistry, University of Otago, PO Box 56, Dunedin, New Zealand

Received April 28, 1998

---

**Parent-of-origin effects were first recorded >3000 years ago by mule breeders in Asia Minor. There are now several different types of evidence suggesting the presence of a large number of imprinted genes, many of which have not yet been identified. Here, we catalogue a wide range of evidence and phenomena which indicate or suggest the presence of genomic imprinting in animals. This evidence includes: the direct documentation of parent-of-origin-specific gene transcription; human disease inheritance patterns which suggest the involvement of imprinted genes; and older, less well studied animal models which may show parent-of-origin effects.**

---

## INTRODUCTION

Although parent-of-origin effects were clearly recognized by the mule breeders in Asia Minor >3000 years ago (1), formal demonstration of genomic imprinting was not achieved until 1991 when the selective maternal expression of *Igf2r*, the paternal expression of *Igf2* and the maternal expression of *H19* in mice were reported (2–4). Since this time, numerous genes have been shown to be subject to genomic imprinting, a process through which the expression of a gene is dependent on the sex of the parent from which it was inherited. Additionally, we now recognize several phenotypes in humans, mice and other animals which show a pattern of inheritance consistent with the involvement of imprinted genes. In retrospect, past writers clearly described parental effects some of which are attributable to genomic imprinting. For example, in 1937 Reed observed parental effects on the Fused phenotype in mice (5), in 1938 Walton and Hammond reported marked and persistent differences in the size of offspring from reciprocal Shire horse–Shetland pony crosses (6), while even Mendel clearly recognized ‘non-Mendelian’ inheritance patterns in some plant crosses when ‘[t]he hybrids had the greatest similarity to the pollen parent...’ (7).

During the last year, the rapid increase in the number of imprinted genes has continued. Significant recent additions to the list of human imprinted genes include: *p73*, a putative tumour suppressor gene involved in neuroblastoma; *KvLQT1*, *IPL* and *IMPT1* in the imprinted cluster of genes on 11p15; *necdin (NDN)* and *UBE3A* in the Prader–Willi/Angelman disease locus on 15q; and genes on the X chromosome which influence the phenotype of Turner syndrome. The study of murine genes continues to provide a source of novel imprinted genes including that for neuronatin on chromosome 2; *Grb10*, a candidate for growth retardation on chromosome 7; the serotonin receptor 2a gene on chromosome 14 and *Impact* on chromosome 18.

In the lists that follow, we have attempted to include as many parent-of-origin effects as possible. The list is inclusive rather than critically selective, and reflects a wide variation in the quality and type of evidence for genomic imprinting. Several different types of

evidence can suggest the presence of genomic imprinting. Firstly, the strongest evidence is provided by direct detection of parent-of-origin-specific transcription from a gene, for example as seen with *SNRPV* which is only transcribed from the paternally inherited allele. Detection of imprinted gene expression in some tissues does not necessarily indicate that the gene will be imprinted in all tissues. For example, *IGF2* which is imprinted in most tissues is expressed from both alleles in the liver and choroid plexus. Similarly, the absence of imprinting in some tissues obviously does not exclude imprinting in other tissues. For example, the Angelman syndrome gene, *UBE3A*, was thought not to be imprinted until allele-specific transcription was detected in the brain.

Secondly, several conditions show an imprinted pattern of inheritance, for example familial glomus tumours only occur by paternal inheritance. However, in this situation, linkage to the disease locus does not necessarily imply that the locus is directly responsible for the parent-of-origin effect.

Thirdly, the association of a specific phenotype with uniparental disomy (UPD) has implicated the presence of imprinted genes on many chromosomes. In humans, the presence of a phenotype in association with UPD does not necessarily indicate the involvement of imprinted genes since UPD is often associated with confined placental mosaicism which is itself associated with intrauterine growth retardation. In the presence of confined placental mosaicism, it is possible that the phenotype of a fetus or child with UPD may occur as a result of a population of ill-functioning trisomic cells in the placenta, rather than as a result of altered dose of an imprinted gene(s). For more detailed reviews of UPD, and for justification of conclusions regarding the likelihood of imprinting, see refs 8–11. In mice, UPD has been generated using animals heterozygous for various Robertsonian translocations (12,13). The presence of a developmental phenotype in association with UPD for a particular chromosomal region indicates the presence of imprinted genes within that segment. However, a normal phenotype cannot exclude the presence of an imprinted gene within the isodisomic segment, given that loss or gain of gene function might not necessarily give rise to a developmental phenotype.

---

\*To whom correspondence should be addressed. Tel: +64 3 479 7868; Fax: +64 3 479 7738; Email: morison@sanger.otago.ac.nz

**Table 1.** Mapped parent-of-origin gene effects in humans

| Chromosome | Location   | Parent-of-origin effect                                                                                                                                                                                                                                                                                                                                                                                                                                                           | Reference  |
|------------|------------|-----------------------------------------------------------------------------------------------------------------------------------------------------------------------------------------------------------------------------------------------------------------------------------------------------------------------------------------------------------------------------------------------------------------------------------------------------------------------------------|------------|
| 1          | 1p36       | <i>p73</i> is maternally expressed and located in the region showing preferential maternal loss of heterozygosity in neuroblastoma.                                                                                                                                                                                                                                                                                                                                               | 22,23      |
|            | UPD        | One case of maternal heterodisomy including partial isodisomy of 1q has been reported. No overt dysmorphic features or developmental anomalies were detected.                                                                                                                                                                                                                                                                                                                     | 24         |
| 2          | 2p24       | <i>N-Myc</i> is amplified preferentially from the paternal allele in neuroblastoma.                                                                                                                                                                                                                                                                                                                                                                                               | 25         |
|            | UPD        | Maternal UPD (five cases) is possibly associated with an abnormal phenotype.                                                                                                                                                                                                                                                                                                                                                                                                      | 26         |
| 4          | 4q21–q22   | Anomalous imprinting has been hypothesized as the reason for the central nervous system overgrowth in the 4q21/4q23 syndrome (no direct evidence).                                                                                                                                                                                                                                                                                                                                | 27         |
|            | UPD        | Maternal UPD (one case) has been reported. Apart from infertility, the phenotype was normal and imprinting is unlikely.                                                                                                                                                                                                                                                                                                                                                           | 10         |
| 5          | 5q22–q31   | <i>U2AFBPL</i> the human homologue of <i>U2afbp-rs</i> (see mouse 11) is imprinted in mice but not in human placenta.                                                                                                                                                                                                                                                                                                                                                             | 28         |
|            | UPD        | Paternal UPD (one case) has been reported, but imprinting is unlikely.                                                                                                                                                                                                                                                                                                                                                                                                            | 10         |
| 6          | 6q25.3–q26 | <i>MASI</i> (a tyrosine kinase protooncogene) shows monoallelic expression in human breast, but was reported not to be imprinted in human fetuses.                                                                                                                                                                                                                                                                                                                                | 29,30      |
|            | 6q25.3     | <i>IGF2R</i> (insulin-like growth factor II receptor; mannose 6-phosphate receptor, cation independent) is maternally expressed in mouse but there are conflicting data from humans. It may be imprinted polymorphically in humans. Allele-specific methylation (methylation of the active maternal allele) is maintained in humans.                                                                                                                                              | 2,31–36    |
|            | 6q22–23    | Neonatal diabetes mellitus. Two cases of neonatal diabetes had paternal UPD 6. Additionally, paternal UPD was associated with agenesis of pancreatic beta cells and neonatal diabetes although paternal UPD has also occurred in a normal child. The critical region may be 6q22–q23: two cases showed duplication 6q22–q23; one family showed linkage. The cases involving duplication suggest that gain of function of a paternally expressed gene is the mechanism of disease. | 37–42      |
|            | UPD        | UPD 6 has rarely been reported despite numerous studies of families at the HLA locus. Maternal UPD was detected in a developmentally normal patient. Paternal UPD is discussed above.                                                                                                                                                                                                                                                                                             | 43         |
| 7          | 7p11.2–p12 | <i>GRB10</i> (growth factor receptor-bound protein 10) is maternally expressed in mice but no human data have been reported (see mouse 7).                                                                                                                                                                                                                                                                                                                                        | 44         |
|            | 7q11.23    | Williams syndrome was associated with significantly more severe growth retardation and microcephaly if the associated deletion of 7q11.23 was maternally derived.                                                                                                                                                                                                                                                                                                                 | 45         |
|            | 7q32       | <i>PEG1/MEST</i> (paternally expressed gene 1/mesoderm-specific transcript, member of the $\alpha/\beta$ -hydroxylase fold family) is paternally expressed in human fetal tissues, but biallelically expressed in adult blood. <i>Peg1</i> is imprinted in mice.                                                                                                                                                                                                                  | 46–48      |
|            | UPD        | Several cases of maternal iso- and heterodisomy in Russell–Silver syndrome indicate the presence of imprinted growth gene(s).                                                                                                                                                                                                                                                                                                                                                     | 49,50      |
| 8          | UPD        | Paternal UPD is associated with normal development.                                                                                                                                                                                                                                                                                                                                                                                                                               | 51         |
| 9          | 9q34       | Loss of maternal ABO antigens has been reported in 4/4 acute myeloid leukaemia cases.                                                                                                                                                                                                                                                                                                                                                                                             | 52         |
|            | UPD        | Maternal UPD (four cases) has been reported, but parent-of-origin effects were considered unlikely.                                                                                                                                                                                                                                                                                                                                                                               | 8,10       |
| 10         | UPD        | Maternal UPD (two cases) has been reported, but parent-of-origin effects were considered unlikely.                                                                                                                                                                                                                                                                                                                                                                                | 8,10       |
| 11         | 11p15      | The 11p15 region (involved in the Beckwith–Wiedemann syndrome) contains a number of imprinted genes, which are listed in order: <i>L23MRP</i> is at the telomeric end of this cluster and is not imprinted.                                                                                                                                                                                                                                                                       |            |
|            |            | <i>H19</i> is maternally expressed in mouse and humans. The gene product is an abundant untranslated RNA of unknown function.                                                                                                                                                                                                                                                                                                                                                     | 2,53–56    |
|            |            | <i>IGF2</i> (insulin-like growth factor 2, a fetal growth factor) is paternally expressed in humans and rodents. Expression is not imprinted in the choroid plexus, leptomeninges, brain, adult human liver and chondrocytes. It is probably imprinted secondarily under the control of the H19 locus.                                                                                                                                                                            | 4,55,57,58 |
|            |            | <i>INS</i> (insulin) is paternally expressed in mouse yolk sac, but not imprinted in human or mouse pancreas. Insulin is suspected to be imprinted in humans since the susceptibility to type 1 diabetes is significantly influenced by the parent-of-origin of insulin alleles, but the mechanism of this effect is unclear.                                                                                                                                                     | 59–64      |
|            |            | <i>ASCL2/HASH2</i> (achaete–scute complex like 2/human achaete–scute homologue 2, human homologue of murine <i>Mash2</i> , a helix–loop–helix transcription factor) is maternally expressed. It is expressed in human extravillous trophoblasts and in the spongiotrophoblast cells of mouse placenta.                                                                                                                                                                            | 65–67      |
|            |            | <i>TAPAI</i> : preliminary data suggest imprinting in the mouse (see mouse 7).<br><i>KCNA9 (KvLQT1)</i> , potassium channel involved in long QT syndrome) is maternally expressed. Its expression is imprinted in several tissues but not in the heart.                                                                                                                                                                                                                           | 68         |

Table 1. Continued

| Chromosome | Location                  | Parent-of-origin effect                                                                                                                                                                                                                                                                                                                                                                                                                                                 | Reference  |
|------------|---------------------------|-------------------------------------------------------------------------------------------------------------------------------------------------------------------------------------------------------------------------------------------------------------------------------------------------------------------------------------------------------------------------------------------------------------------------------------------------------------------------|------------|
|            |                           | <i>CDKN1C</i> ( <i>p57<sup>KIP2</sup></i> , a cyclin-dependent kinase inhibitor) was maternally expressed in humans and mouse. It is completely imprinted in mouse but only partially in humans.                                                                                                                                                                                                                                                                        | 69–72      |
|            |                           | <i>2G3–8</i> is under study, but may show allelic expression bias in some tissues.                                                                                                                                                                                                                                                                                                                                                                                      | 73         |
|            |                           | <i>IMPT1/BWR1A.ORCTL2</i> (imprinted multi-membrane-spanning polyspecific transporter-like gene-1) is relatively repressed on the paternal allele.                                                                                                                                                                                                                                                                                                                      | 73–75      |
|            |                           | <i>IPL/TSSC3/BWR1C</i> (imprinted in placenta and liver, tumour-suppressing STF cDNA 3) shows maternal expression with relative repression of the paternal allele. It is expressed in placenta and most fetal tissues and is homologous to mouse apoptosis-promoting gene <i>TDAG51</i> .                                                                                                                                                                               | 75–77      |
|            |                           | <i>NAP2</i> is at the centromeric end of the cluster and is not imprinted.                                                                                                                                                                                                                                                                                                                                                                                              |            |
|            | 11p13                     | <i>WT1</i> (Wilms tumour 1, a zinc finger protein): there are conflicting data. It was reported to be partially or completely imprinted and maternally expressed in some tissues (placenta and brain) but was paternally expressed in fibroblasts and lymphocytes from some individuals.                                                                                                                                                                                | 78,79      |
|            | 11q13                     | <i>FCER1B</i> ( $\beta$ subunit of the high-affinity IgE receptor): in allergic asthmatics, the Leu181 allele was always maternally inherited (10/10 families).                                                                                                                                                                                                                                                                                                         | 80         |
|            | 11q13.1,<br>11q22.3–q23.3 | Familial glomus tumours (non-chromaffin paragangliomas): linkage studies suggest two distinct loci, but the tumour susceptibility is always inherited from carrier fathers.                                                                                                                                                                                                                                                                                             | 81–84      |
| 13         | 13q14                     | <i>RB</i> locus: the retinoblastoma gene itself does not appear to be imprinted, but there may be parent-of-origin effects on the transmission of retinoblastoma susceptibility in humans and in mice (earlier onset of tumours when mutant <i>Rb</i> is paternally inherited). In an unexplained observation, the parental origin of a chromosomal rearrangement near <i>RB</i> affected the <i>NruI</i> restriction enzyme digestion pattern.                         | 85–87      |
|            | 13q14                     | <i>HTR2a</i> [serotonin (hydroxytryptamine) receptor type 2a] was expressed biallelically in normal tissues, but in fibroblasts of retinoblastoma patients with germline deletions or translocations it was only expressed in those with a paternally derived deletion or translocation (5/5), but not in those with a maternal deletion (2/2). Promoter region methylation (partial) corresponded positively with expression. It is imprinted in mouse (see mouse 14). | 88         |
|            | UPD                       | Maternal (three cases) and paternal UPD (one case) have been reported, but parent-of-origin effects are unlikely.                                                                                                                                                                                                                                                                                                                                                       | 10         |
| 14         | 14q24.3–q31               | A case report of dup(14q24.3–31), inherited from a phenotypically normal father, suggests that this region may be imprinted.                                                                                                                                                                                                                                                                                                                                            | 89         |
|            | UPD                       | Both paternal and maternal UPD suggest parent-of-origin effects on this chromosome. Maternal uniparental heterodisomy and isodisomy (eight cases in the literature) is associated with a characteristic phenotype [hypotonia, motor developmental delay, mild dysmorphic facial features, low birth weight, growth abnormalities (precocious puberty)]. Paternal UPD (four cases) is associated with a severe mental and musculoskeletal phenotype.                     | 8,10,90–92 |
| 15         | 15q11–q13                 | The 15q11–q13 region contains a cluster of imprinted genes that may be involved in the pathogenesis of the Prader–Willi and Angelman syndromes; they are listed in order from the centromeric end:                                                                                                                                                                                                                                                                      | 93         |
|            |                           | <i>ZNF127</i> and <i>FNZ127</i> are two overlapping paternally expressed transcripts. <i>ZNF127</i> putatively encodes a 505 amino acid polypeptide-containing zinc finger motif.                                                                                                                                                                                                                                                                                       | 93–95      |
|            |                           | <i>NDN</i> (necdin) is paternally expressed in brain (human and mouse) and fibroblasts. It is expressed in differentiated neurones.                                                                                                                                                                                                                                                                                                                                     | 96–98      |
|            |                           | BD exons of <i>SNRPN</i> . This region may constitute the 15q imprinting centre and is comprised of alternate 5' exons (the BD exons, BD1B, BD1B*, BD1A, BD2, BD3) of <i>SNRPN</i> . Mutations of these exons cause Angelman syndrome perhaps through failure to erase the imprint from the previous generation.                                                                                                                                                        | 99–101     |
|            |                           | <i>SNRPN</i> (small nuclear ribonucleoprotein-associated polypeptide N) is paternally expressed and may be involved in the pathogenesis of Prader–Willi syndrome. It may be imprinted secondarily, under the control of an imprinting centre.                                                                                                                                                                                                                           | 102,103    |
|            |                           | <i>PAR-SN</i> (an RNA transcript between <i>SNRPN</i> and <i>PAR5</i> ) is paternally expressed in lymphoblasts.                                                                                                                                                                                                                                                                                                                                                        | 100        |
|            |                           | <i>PAR5</i> ( <i>D15S226E</i> ) (Prader–Willi/Angelman region) is paternally expressed but contains no open reading frames.                                                                                                                                                                                                                                                                                                                                             | 103        |
|            |                           | <i>IPW</i> (imprinted in Prader–Willi) is paternally expressed but probably untranslated.                                                                                                                                                                                                                                                                                                                                                                               | 104        |
|            |                           | <i>PAR1</i> ( <i>D15S227E</i> ) (Prader–Willi/Angelman region) is paternally expressed but probably contains no open reading frames.                                                                                                                                                                                                                                                                                                                                    | 103        |
|            |                           | <i>UBE3A/E6-AP</i> (ubiquitin protein ligase 3A) is maternally expressed in human and mouse brain, but is biallelically expressed in other tissues. This gene is mutated in some cases of Angelman syndrome, deleted in others (60–70%), and affected by paternal UPD in others.                                                                                                                                                                                        | 105,106    |
|            |                           | GABAA receptor subunit genes ( <i>GABRB3</i> , <i>GABRA5</i> , <i>GABRG3</i> ) are paternally expressed. There is paternal methylation of the 5' end of <i>GABRB3</i> .                                                                                                                                                                                                                                                                                                 | 107        |

Table 1. Continued

| Chromosome | Location      | Parent-of-origin effect                                                                                                                                                                                                                                                                                                                                                                                                                                                                                                                                                        | Reference |
|------------|---------------|--------------------------------------------------------------------------------------------------------------------------------------------------------------------------------------------------------------------------------------------------------------------------------------------------------------------------------------------------------------------------------------------------------------------------------------------------------------------------------------------------------------------------------------------------------------------------------|-----------|
| 16         | 15q11–q13     | Autism in a family was associated with a 15q11–q13 duplication only when maternally transmitted.                                                                                                                                                                                                                                                                                                                                                                                                                                                                               | 108       |
|            | UPD           | Maternal UPD (nine cases) has been reported, but most had trisomy 16 mosaicism, to which growth retardation could be attributed. Imprinting was considered possible based on studies of 26 patients with placental mosaicism for trisomy 16 and based on developmental anomalies in a minority of patients (anal atresia and hypospadias). Paternal UPD (1 case) has been reported, but parent-of-origin effects were considered unlikely.                                                                                                                                     | 10,11     |
| 19         | 19q13.4       | <i>PEG3</i> , the human homologue of imprinted mouse gene <i>Peg3</i> (see mouse 7) is located here, but its imprinting status has not been reported.                                                                                                                                                                                                                                                                                                                                                                                                                          | 109       |
| 20         | 20q13.11      | <i>GNAS</i> (Gs alpha, a G protein) is assumed to have specific paternal expression in some tissues based on <i>in situ</i> hybridization in mice with PatDp2 and MatDp2 and in humans because of the transmittance pattern of Albright hereditary osteodystrophy (33/36 transmitting parents were maternal). All 60 maternal offspring had full expression of the phenotype (pseudo-hypoparathyroidism type Ia) whereas all six paternal offspring had partial expression (pseudopseudo-hypoparathyroidism). However, transcription in human fetal tissues was not imprinted. | 110–112   |
| 21         | UPD           | Maternal (three cases) and paternal UPD (two cases) have been reported, but parent-of-origin effects were considered unlikely.                                                                                                                                                                                                                                                                                                                                                                                                                                                 | 10        |
| 22         | UPD           | Maternal (three cases) and paternal UPD (one case) have been reported, but parent-of-origin effects were considered unlikely.                                                                                                                                                                                                                                                                                                                                                                                                                                                  | 10,113    |
| X          | Xq13.2        | <i>XIST</i> shows preferential paternal expression with associated silencing of the paternal X chromosome in the extraembryonic tissues of mouse and in trophoblastic cells in humans. <i>XIST</i> is an untranslated RNA. Most genes on the X chromosome could be described as secondarily imprinted, in response to <i>XIST</i> expression.                                                                                                                                                                                                                                  | 114–117   |
|            | Xp11.23–Xqter | Turner syndrome patients with a maternally retained X (45,Xm) showed significantly poorer verbal and higher-order executive function skills than those with 45,Xp. A higher prevalence of cardiovascular abnormalities and neck webbing was noted when the retained X was maternal.                                                                                                                                                                                                                                                                                            | 118,119   |
|            | UPD           | Maternal UPD had no obvious clinical stigmata. Paternal UPD (one case) was associated with impaired gonadal function and shortness of stature.                                                                                                                                                                                                                                                                                                                                                                                                                                 | 120,121   |

Table 2. Other human conditions showing unmapped parental effects

| Condition                            | Unmapped parental effects                                                                                                                                                                                                                                                                                                                                                                                                                                            | Reference   |
|--------------------------------------|----------------------------------------------------------------------------------------------------------------------------------------------------------------------------------------------------------------------------------------------------------------------------------------------------------------------------------------------------------------------------------------------------------------------------------------------------------------------|-------------|
| Hirschsprung disease                 | Patients with familial Hirschsprung disease were more likely to inherit the mutant RET protooncogene (10q11.2) from their mothers.                                                                                                                                                                                                                                                                                                                                   | 122         |
| Neurofibromatosis type 2             | This shows earlier onset and more severe disease when maternally inherited. NF2 is caused by mutations of <i>SCH/Merlin</i> on 22q12.                                                                                                                                                                                                                                                                                                                                | 123,124     |
| Schizophrenia                        | Affected sibling pairs were more likely to be of the same sex when the history of schizophrenia was on the paternal side. Negative symptom scores and clinical course scores were significantly higher (worse) when paternally inherited, but there is also evidence for anticipation, suggesting the involvement of an unstable trinucleotide repeat. In contrast, some groups have found no evidence of true anticipation or of a parental effect on age of onset. | 125–128     |
| Bipolar affective disorder           | Cases with paternal transmission showed earlier onset, and anticipation was found only with paternal inheritance. This effect may be attributable to trinucleotide repeat expansions. The presence of parental effects has been disputed by others.                                                                                                                                                                                                                  | 127,129–135 |
| Progressive diaphyseal dysplasia     | Imprinting and/or paternal-specific repeat expansion has been proposed to explain phenotypic variability and possible anticipation in a three-generation family.                                                                                                                                                                                                                                                                                                     | 136         |
| Brachmann–de Lange syndrome          | In all convincing autosomal dominant cases, the transmitting parent was the mother. This syndrome shows a variable phenotype with growth retardation, facial dysmorphism including micrognathia, microbrachycephaly, small hands and feet, and mental retardation.                                                                                                                                                                                                   | 137         |
| Familial hypertrophic cardiomyopathy | In a Mennonite kindred with dominant cardiomyopathy not linked to $\beta$ -myosin heavy chain gene, a disproportionate number of transmitting parents were females, i.e. 2/32 (6%) offspring of males were affected versus 7/12 (58%) offspring of females.                                                                                                                                                                                                          | 138         |
| Spina bifida                         | There were twice as many gene-carrying mothers as fathers.                                                                                                                                                                                                                                                                                                                                                                                                           | 139         |
| Psoriasis vulgaris                   | Parental effect on birth weight has been reported, and paternal inheritance caused more severe disease.                                                                                                                                                                                                                                                                                                                                                              | 140         |
| Tourette syndrome                    | This syndrome showed parent-of-origin phenotype differences, and maternally transmitted offspring showed a significantly earlier age at onset. These differences have not been confirmed by others.                                                                                                                                                                                                                                                                  | 141–143     |
| Polycystic kidney disease            | Predominantly maternal transmission of PKD has been reported, along with an earlier onset of disease when maternally inherited, but this was not confirmed by others.                                                                                                                                                                                                                                                                                                | 144,145     |
| Crohn's disease                      | Among 33 non-Jewish parent–child pairs with Crohn's disease, 28 involved maternal transmission, whereas five involved paternal transmission.                                                                                                                                                                                                                                                                                                                         | 146         |
| Epilepsy                             | A higher risk of seizures has been reported in the offspring of mothers than of fathers with epilepsy.                                                                                                                                                                                                                                                                                                                                                               | 147         |

**Table 3.** Mouse imprinted regions and genes

| Chromosome | Region   | Comments                                                                                                                                                                                                                                                                                                                                                                   | Reference              |
|------------|----------|----------------------------------------------------------------------------------------------------------------------------------------------------------------------------------------------------------------------------------------------------------------------------------------------------------------------------------------------------------------------------|------------------------|
| 2          | Proximal | Maternal disomy causes early embryonic lethality.                                                                                                                                                                                                                                                                                                                          | 13                     |
|            | Distal   | There may be two imprinted regions. Neuronatin ( <i>Nnat</i> , <i>Peg5</i> ) is paternally expressed, maternally methylated, and expressed in pituitary, central and peripheral nervous systems. In a more distal region which contains <i>Gnas</i> (see human 20q13), both maternal and paternal disomy cause neonatal lethality.                                         | 13,148,149             |
| 6          | Proximal | Maternal disomy of this region, which includes <i>Peg1/Mest</i> (see human 7q), is associated with early embryonic lethality.                                                                                                                                                                                                                                              | 13,48                  |
| 7          | Proximal | <i>Peg3/Apoc2</i> is a paternally expressed, zinc finger protein. <i>Asp3</i> (audiogenic seizure prone gene 3) is an as yet unidentified gene linked to proximal chromosome 7. The susceptibility of epilepsy-prone mice to audiogenic seizures was dependent on parental origin. Maternal disomy shows late fetal lethality with fetal and placental growth retardation. | 13,48,150,151          |
|            | Central  | This region is syntenic with human 15q11–q13 and includes <i>Ndn</i> , <i>Snrpn</i> , <i>Ipw</i> , <i>Ube3a</i> and <i>Znf127</i> .                                                                                                                                                                                                                                        | 93,98,152–154          |
|            | Distal   | This region is syntenic with human 11p15.5 and includes <i>H19</i> , <i>Igf2</i> , <i>Ins2</i> , <i>Mash2</i> , <i>Tapa1</i> , <i>Kvlqt1</i> , <i>p57Kip2</i> , <i>Impt</i> and <i>Ipl</i> . Preliminary data indicate that <i>Tapa1</i> shows relative repression of the paternal allele in extra-embryonic tissues.                                                      | 3,4,59,66,69,73,77,155 |
|            |          | Evidence from marsupials suggests that the common location of the central 7 and distal 7 imprinted gene clusters has occurred by chance, and does not suggest an evolutionary relationship.                                                                                                                                                                                | 156                    |
| 9          |          | <i>Grf1</i> ( <i>Irlgs2/Cdc25Mm</i> , a guanine nucleotide exchange factor) is paternally expressed, but the maternal allele is expressed at low levels (<10% of paternal levels) in brain.                                                                                                                                                                                | 157                    |
| 11         | Proximal | <i>U2afbp-rs/U2af1-rs1/D11Ncvs75</i> (U2 small nuclear ribonucleoprotein auxiliary factor-binding protein-related sequence) is paternally expressed. The human homologue ( <i>U2AFBPL</i> ) is not imprinted in placenta.                                                                                                                                                  | 28,158,159             |
|            |          | <i>Grb10/Meg1</i> (growth factor receptor-bound protein 10/maternally expressed gene 1) is maternally expressed. The GRB10 protein binds to the insulin receptor and the IGF1 receptor, and is a candidate for the growth retardation of Russell–Silver syndrome in humans.                                                                                                | 44                     |
|            |          | Maternal disomy resulted in small size (0.7× normal) whereas paternal disomy resulted in large size (1.3× normal). The mice were otherwise normal and fertile.                                                                                                                                                                                                             | 13                     |
| 12         |          | <i>Gtl2lacZ</i> : a dwarfism phenotype resulting from an insertional mutation of a <i>LacZ</i> -containing transgene. Although expression from the transgene was not affected by its parent-of-origin, the mutant dwarfism phenotype was expressed most strongly when paternally inherited.                                                                                | 160                    |
|            | Distal   | Early embryonic lethality occurs when both alleles are inherited paternally.                                                                                                                                                                                                                                                                                               | 13                     |
| 14         | Band D3  | <i>Htr2</i> (serotonin receptor 2a) shows maternal expression in mouse cerebrum, ovary and embryonic eye.                                                                                                                                                                                                                                                                  | 161                    |
|            |          | <i>Rb1</i> (retinoblastoma gene): there is no direct evidence of imprinting, but melanotroph tumours have an earlier onset when mutant <i>Rb1</i> is paternally inherited.                                                                                                                                                                                                 | 86                     |
| 17         | Proximal | This includes the <i>Tme</i> locus (T-maternal effect) which is related to the Hairpin tail mutation locus. This phenotype is attributable to disruption of the imprinted gene <i>Igf2r</i> (insulin-like growth factor 2 receptor). <i>Igf2r</i> is maternally expressed in mouse but there are conflicting data in humans.                                               | 2,31–36                |
|            |          | <i>Mas</i> (65 kb from <i>Igf2r</i> ; cell surface receptor and proto-oncogene) was reported to be paternally expressed but this has been disputed. The human data are also conflicting (see human 6q25.3–q26).                                                                                                                                                            | 162,163                |
|            |          | <i>Fu</i> (fused): the penetrance of the autosomal fused gene was strongly dependent on its parental origin. For example, when maternally inherited, ~33% of heterozygotes had a fused skeletal phenotype compared with 81% when paternally inherited.                                                                                                                     | 5                      |
|            |          | Paternal disomy causes small body size (0.7× normal) evident from day 7 after birth.                                                                                                                                                                                                                                                                                       | 13                     |
| 18         | Proximal | <i>Impact</i> (imprinted and ancient, belongs to the YCR59c/yigZ protein family with unknown function) is paternally expressed. It was identified by allelic message display.                                                                                                                                                                                              | 164                    |
|            |          | Maternal and paternal disomy are possibly associated with growth retardation.                                                                                                                                                                                                                                                                                              | 165                    |
| 19         | Distal   | <i>Ins1</i> (insulin 1) is paternally expressed. It was reported to be imprinted in yolk sac at day 16, but not in the pancreas. In contrast, others found no evidence of imprinting at days 12.5, 13.5 and 14.5. It has no human homologue.                                                                                                                               | 59,166                 |
| X          |          | <i>Xist</i> : there is preferential inactivation of the paternal X chromosome in extra-embryonic tissues, corresponding to preferential expression of the paternal <i>Xist</i> .                                                                                                                                                                                           | 115,116,167            |
|            |          | <i>Mdx</i> (dystrophin) expression: parent-of-origin effects on the proportion of muscle cells expressing dystrophin in mice inheriting a heterozygous null mutation of dystrophin have been reported.                                                                                                                                                                     | 168                    |
|            |          | Ovarian granulosa cell carcinoma: an X-linked imprinted gene modifies the predisposition to tumorigenesis in SWR and SWRXJ mice.                                                                                                                                                                                                                                           | 169                    |

Where genes have shown to be imprinted in both mice in humans, we refer the reader to the appropriate human chromosome for additional details. For additional details and references see Cattanach and Beechey's mouse imprinting map (13).

**Table 4.** Other parent-of-origin effects in animals

| Phenotype                                                        | Parent-of-origin effect                                                                                                                                                                                                                                                                                                                                                                                                                                                                                                                                                                                                                                                                                                                                                                                                                                                                                                            | Reference |
|------------------------------------------------------------------|------------------------------------------------------------------------------------------------------------------------------------------------------------------------------------------------------------------------------------------------------------------------------------------------------------------------------------------------------------------------------------------------------------------------------------------------------------------------------------------------------------------------------------------------------------------------------------------------------------------------------------------------------------------------------------------------------------------------------------------------------------------------------------------------------------------------------------------------------------------------------------------------------------------------------------|-----------|
| Mouse body size                                                  | In crosses between <i>Peromyscus polionotus</i> (the old field mouse, monogamous) and <i>P.maniculatus</i> (deer mouse, polygamous), the size of the offspring depended on the direction of the cross.                                                                                                                                                                                                                                                                                                                                                                                                                                                                                                                                                                                                                                                                                                                             | 170       |
| Mouse fat pad weight                                             | Imprinting has been suggested as a possible explanation for matrilineal and patrilineal effects on the size of epididymal and retroperitoneal fat pads in SWR/J×AKR/J mice.                                                                                                                                                                                                                                                                                                                                                                                                                                                                                                                                                                                                                                                                                                                                                        | 171       |
| G6PD in mouse                                                    | A parental effect on allele-specific expression levels of G6PD has been reported.                                                                                                                                                                                                                                                                                                                                                                                                                                                                                                                                                                                                                                                                                                                                                                                                                                                  | 172       |
| Megakaryocyte production in mice                                 | Platelet counts, total circulating platelet counts and platelet size were influenced by the parent of origin.                                                                                                                                                                                                                                                                                                                                                                                                                                                                                                                                                                                                                                                                                                                                                                                                                      | 173       |
| Egg susceptibility to hyaluronidase and pronase                  | In mice, this was influenced by the parent-of-origin.                                                                                                                                                                                                                                                                                                                                                                                                                                                                                                                                                                                                                                                                                                                                                                                                                                                                              | 174       |
| MHC class I antigen expression in rats                           | Only paternal class I antigens were expressed in the placenta of crosses between WF(u) and DA(a) rat strains.                                                                                                                                                                                                                                                                                                                                                                                                                                                                                                                                                                                                                                                                                                                                                                                                                      | 175–177   |
| Transgene expression in mice                                     | For many transgenes, the expression and methylation of the gene depends on the parental origin of the transgene. These models of imprinting also demonstrate the importance of strain-specific modifiers of the imprinting process.                                                                                                                                                                                                                                                                                                                                                                                                                                                                                                                                                                                                                                                                                                | 178,179   |
| Chorionic gonadotrophin beta in horses                           | This hormone is probably imprinted in the horse and donkey. The expression levels and its ovarian effects are dependent on the parental origin in horse–donkey crosses.                                                                                                                                                                                                                                                                                                                                                                                                                                                                                                                                                                                                                                                                                                                                                            | 180–183   |
| Horse size                                                       | Reciprocal crosses between the large Shire horse and the small Shetland pony showed marked and persistent differences in the size of the offspring, depending on the direction of the cross.                                                                                                                                                                                                                                                                                                                                                                                                                                                                                                                                                                                                                                                                                                                                       | 6         |
| Appearance of horse–donkey cross                                 | A horse mare–donkey cross gives rise to a mule, whereas a donkey–stallion cross produces a hinny.                                                                                                                                                                                                                                                                                                                                                                                                                                                                                                                                                                                                                                                                                                                                                                                                                                  | 184,185   |
| Sheep buttock size                                               | The callipyge gene phenotype ('beautiful buttocks') is only expressed when paternally inherited.                                                                                                                                                                                                                                                                                                                                                                                                                                                                                                                                                                                                                                                                                                                                                                                                                                   | 186       |
| ADH expression in chicken–quail hybrids                          | Repression of the paternal alcohol dehydrogenase allele has been reported in unidirectional crosses.                                                                                                                                                                                                                                                                                                                                                                                                                                                                                                                                                                                                                                                                                                                                                                                                                               | 187       |
| Frog body size                                                   | In frog crosses, there was a parent-of-origin effect on the body and head size.                                                                                                                                                                                                                                                                                                                                                                                                                                                                                                                                                                                                                                                                                                                                                                                                                                                    | 188       |
| Enzyme expression in fish                                        | There are several examples of repression of specific parental enzyme alleles, some of which may be attributable to inter-species effects. For example, the paternal allele of 6-phosphogluconate dehydrogenase was repressed at a specific developmental stage of Cyprinid fish ( <i>Rutilus rutilus</i> ). Transient repression of the maternal isozyme of $\alpha$ -glycerophosphate dehydrogenase was observed in offspring from a female brown trout and a male brook trout, but not for the reciprocal cross. Repression of the maternal allele of glucose 6-phosphate dehydrogenase, the maternal allele of a liver esterase, and repression of a paternal esterase has been observed in intertribal or interspecific sunfish hybrids (one directional crosses only).                                                                                                                                                        | 189–192   |
| Transgene expression in Zebra fish                               | Parental effects on transgene methylation have been reported, but androgenetic zebrafish develop normally, suggesting that genes essential for development are not imprinted.                                                                                                                                                                                                                                                                                                                                                                                                                                                                                                                                                                                                                                                                                                                                                      | 193,194   |
| <i>Drosophila</i> mutant phenotype                               | In 1959, Spofford reported that the greatest source of phenotypic variation in the expression of a mutant white locus gene was the parental source of the causative translocation. In a transgenic model of position effect variegation enhancement, using <i>Drosophila</i> with the <i>In(1)w<sup>m4h</sup></i> mutation, <i>w<sup>m4h</sup></i> gene repression in the offspring was strictly dependent on the previous paternal transmission of the transgene. This effect may correspond to the intergenerational Y chromosome-linked 'genetic imprinting' observed in an <i>E(var)3-93D</i> mutant. In another report, <i>In(1)w<sup>m4</sup></i> mutants were subject to 'genomic imprinting' in that the extent of variegation in eye colour was influenced by the genetic background that the variegating chromosome was subjected to during gametogenesis. However, the effect was not dependent on the parental origin. | 195–198   |
| Sex determination in <i>Nasonia vitripennis</i> (parasitic wasp) | Sex determination was directly correlated with the embryonic presence of correctly imprinted chromosomes of paternal origin, supporting a model of 'genomic imprinting sex determination'.                                                                                                                                                                                                                                                                                                                                                                                                                                                                                                                                                                                                                                                                                                                                         | 199       |

Some of the putative imprinting parental effects may be attributable to a parental bias in the probability of a 'mutational' event occurring during the development of either the oocyte or of spermatozoa (14). For example, *de novo* mutations of several genes including *WTI* (15), *RB* (16,17), *NFI* (18) and *RET* (19) almost always occur during male gametogenesis, whereas deletions causing DiGeorge syndrome may occur more frequently during oogenesis (20). Similarly, the expansion of trinucleotide repeats associated with conditions such as fragile X syndrome, Huntington disease, myotonic dystrophy, spinal and bulbar

muscular atrophy, spinocerebellar ataxia type 1, dentatorubral-pallidolusian atrophy and Machado–Joseph disease almost all show expansion during male gametogenesis (21).

## ACKNOWLEDGEMENTS

We thank the University of Otago Science Library staff and Sue Cleverley for assistance in collecting and collating reference material. This work has been supported by grants from the Cancer

Society of New Zealand, the New Zealand Lottery Grants Board and the Health Research Council of New Zealand.

## REFERENCES

- Savory, T.H. (1970) The mule. *Sci. Am.*, **223**(6), 102–109.
- Barlow, D.P., Stöger, R., Herrmann, B.G., Saito, K. and Schweifer, N. (1991) The mouse insulin-like type-2 receptor is imprinted and closely linked to the *Tme* locus. *Nature*, **349**, 84–87.
- Bartolomei, M.S., Zemel, S. and Tilghman, S.M. (1991) Parental imprinting of the mouse H19 gene. *Nature*, **351**, 153–155.
- DeChiara, T.M., Robertson, E.J. and Efstratiadis, A. (1991) Parental imprinting of the mouse insulin-like growth factor II gene. *Cell*, **64**, 849–859.
- Reed, S.C. (1937) The inheritance and expression of fused, a new mutation in the house mouse. *Genetics*, **22**, 1–13.
- Walton, A. and Hammond, J. (1938) The maternal effects on growth and conformation in Shire horse–Shetland pony crosses. *Proc. R. Soc. Lond. Ser. B*, **125**, 311–335.
- Mendel, G.J. (1965) *Experiments in Plant Hybridisation*. Oliver & Boyd, Edinburgh.
- Hurst, L.D. and McVean, G.T. (1997) Growth effects of uniparental disomies and the conflict theory of genomic imprinting. *Trends Genet.*, **13**, 436–443.
- Kalousek, D.K. (1994) Current topic: confined placental mosaicism and intrauterine fetal development. *Placenta*, **15**, 219–230.
- Ledbetter, D.H. and Engel, E. (1995) Uniparental disomy in humans: development of an imprinting map and its implications for prenatal diagnosis. *Hum. Mol. Genet.*, **4**, 1757–1764.
- Robinson, W.P., Barrett, I.J., Bernard, L., Telenius, A., Bernasconi, F., Wilson, R.D., Best, R.G., Howard-Peebles, P.N., Langlois, S. and Kalousek, D.K. (1997) Meiotic origin of trisomy in confined placental mosaicism is correlated with presence of fetal uniparental disomy, high levels of trisomy in trophoblast, and increased risk of fetal intrauterine growth restriction. *Am. J. Hum. Genet.*, **60**, 917–927.
- Cattanach, B.M. (1986) Parental origin effects in mice. *J. Embryol. Exp. Morphol.*, **97** (suppl.), 137–150.
- Cattanach, B.M. and Beechey, C.V. (1997) Genetic imprinting in the mouse: possible final analysis. In Reik, W. and Surani, A. (eds), *Genomic Imprinting*. Oxford University Press, New York, pp. 118–145.
- Chandley, A.C. (1991) On the parental origin of de novo mutation in man. *J. Med. Genet.*, **28**, 217–223.
- Huff, V., Meadows, A., Riccardi, V.M., Strong, L.C. and Saunders, G.F. (1990) Parental origin of de novo constitutional deletions of chromosomal band 11p13. *Am. J. Hum. Genet.*, **47**, 155–160.
- Toguchida, J., Ishizaki, K., Sasaki, M.S., Nakamura, Y., Ikenaga, M., Kato, M., Sugimoto, M., Kotoura, Y. and Yamamuro, T. (1989) Preferential mutation of paternally derived RB gene as the initial event in sporadic osteosarcoma. *Nature*, **338**, 156–158.
- Kato, M.V., Ishizaki, K., Shimizu, T., Ejima, Y., Tanooka, H., Takayama, J., Kaneko, A., Toguchida, J. and Sasaki, M.S. (1994) Parental origin of germ-line and somatic mutations in the retinoblastoma gene. *Hum. Genet.*, **94**, 31–38.
- Jadayel, D., Fain, P., Upadhyaya, M., Ponder, M.A., Carey, J., Fryer, A., Mathew, C.G.P., Barker, D.F. and Ponder, B.A.J. (1990) Paternal origin of new mutations in Von Recklinghausen neurofibromatosis. *Nature*, **343**, 558–559.
- Carlson, K.M., Bracamontes, J., Jackson, C.E., Clark, R., Lacroix, A., Wells, S.A. Jr and Goodfellow, P.J. (1994) Parent-of-origin effects in multiple endocrine neoplasia type 2B. *Am. J. Hum. Genet.*, **55**, 1076–1082.
- Seaver, L.H., Pierpont, J.W., Erickson, R.P., Donnerstein, R.L. and Cassidy, S.B. (1994) Pulmonary atresia associated with maternal 22q11.2 deletion: possible parent of origin effect in the conotruncal anomaly face syndrome. *J. Med. Genet.*, **31**, 830–834.
- Reddy, P.S. and Housman, D.E. (1997) The complex pathology of trinucleotide repeats. *Curr. Opin. Cell Biol.*, **9**, 364–372.
- Kaghad, M., Bonnet, H., Yang, A., Creancier, L., Biscan, J.-C., Valent, A., Minty, A., Chalou, P., Lelias, J.-M., Dumont, X., Ferrara, P., McKeon, F. and Caput, D. (1997) Monoallelically expressed gene related to p53 at 1p36, a region frequently deleted in neuroblastoma and other human cancers. *Cell*, **90**, 809–819.
- Caron, H., van Sluis, P., van Hoeve, M., de Kraker, J., Bras, J., Slater, R., Mannens, M., Voute, P.A., Westerveld, A. and Versteeg, R. (1993) Allelic loss of chromosome 1p36 in neuroblastoma is of preferential maternal origin and correlates with *N-myc* amplification. *Nature Genet.*, **4**, 187–190.
- Pulkkinen, L., Bullrich, F., Czarnecki, P., Weiss, L. and Uitto, J. (1997) Maternal uniparental disomy of chromosome 1 with reduction to homozygosity of the LAMB3 locus in a patient with Herlitz junctional epidermolysis bullosa. *Am. J. Hum. Genet.*, **61**, 611–619.
- Cheng, J.M., Hiemstra, J.L., Schneider, S.S., Naumova, A., Cheung, N.-K.V., Cohn, S.L., Diller, L., Sapienza, C. and Brodeur, G.M. (1993) Preferential amplification of the paternal allele of the *N-myc* gene in human neuroblastomas. *Nature*, **4**, 191–194.
- Shaffer, L.G., McCaskill, C., Egli, C.A., Baker, J.C. and Johnston, K.M. (1997) Is there an abnormal phenotype associated with maternal isodisomy for chromosome 2 in the presence of two isochromosomes? *Am. J. Hum. Genet.*, **61**, 461–462.
- Nowaczyk, M.J.M., Teshima, I.E., Siegel-Bartelt, J. and Clarke, J.T.R. (1997) Deletion 4q21/4q22 syndrome: two patients with de novo 4q21.3q23 and 4q13.2q23 deletions. *Am. J. Med. Genet.*, **69**, 400–405.
- Pearsall, R.S., Shibata, H., Brozowska, A., Yoshino, K., Okuda, K., deJong, P.J., Plass, C., Chapman, V.M., Hayashizaki, Y. and Held, W.A. (1996) Absence of imprinting in U2AFBPL, a human homologue of the imprinted mouse gene *U2afbp-rs*. *Biochem. Biophys. Res. Commun.*, **222**, 171–177.
- Miller, N., McCann, A.H., O'Connell, D., Pedersen, I.S., Spiers, V., Gorey, T. and Dervan, P.A. (1997) The *MAS* proto-oncogene is imprinted in human breast tissue. *Genomics*, **46**, 509–512.
- Riesewijk, A.M., Schepens, M.T., Mariman, E.M., Ropers, H.-H. and Kalscheuer, V.M. (1996) The *MAS* proto-oncogene is not imprinted in humans. *Genomics*, **35**, 380–382.
- Kalscheuer, V.M., Mariman, E.C., Schepens, M.T., Rehder, H. and Ropers, H.-H. (1993) The insulin-like growth factor type-2 receptor gene is imprinted in the mouse but not in humans. *Nature Genet.*, **5**, 74–78.
- Polychronakos, C. (1994) Parental imprinting of the genes for IGF-II and its receptor. In LeRoith, D. and Raizada, M.K. (eds), *Current Directions in Insulin-Like Growth Factor Research*. Plenum Press, New York, pp. 189–203.
- Xu, Y., Goodyer, C.G., Deal, C. and Polychronakos, C. (1993) Functional polymorphism in the parental imprinting of the human *IGF2R* gene. *Biochem. Biophys. Res. Commun.*, **197**, 747–754.
- Smrzka, O.W., Faé, I., Stöger, R., Kurzbauer, R., Fischer, G.F., Henn, T., Weith, A. and Barlow, D.P. (1995) Conservation of a maternal-specific methylation signal at the human *IGF2R* locus. *Hum. Mol. Genet.*, **4**, 1945–1952.
- Stöger, R., Kubicka, P., Liu, C.-G., Kafri, T., Razin, A., Cedar, H. and Barlow, D.P. (1993) Maternal-specific methylation of the imprinted mouse *Igf2r* locus identifies the expressed locus as carrying the imprinting signal. *Cell*, **73**, 61–71.
- Riesewijk, A.M., Schepens, M.T., Welch, T.R., van den Berg-Loonen, E.M., Mariman, E.M., Ropers, H.-H. and Kalscheuer, V.M. (1996) Maternal-specific methylation of the human *IGF2R* gene is not accompanied by allele-specific transcription. *Genomics*, **31**, 158–166.
- Temple, I.K., James, R.S., Crolla, J.A., Sitch, F.L., Jacobs, P.A., Howell, W.M., Betts, P., Baum, J.D. and Shield, J.P.H. (1995) An imprinted gene(s) for diabetes? *Nature Genet.*, **9**, 110–112.
- Abramowicz, M.J., Andrien, M., Dupont, E., Dorchy, H., Parma, J., Duprez, L., Ledley, F.D., Courtens, W. and Vamos, E. (1994) Isodisomy of chromosome 6 in a newborn with methylmalonic acidemia and agenesis of pancreatic beta cells causing diabetes mellitus. *J. Clin. Invest.*, **94**, 418–421.
- Welch, T.R., Beischel, L.S., Choi, E., Balakrishnan, K. and Bishof, N.A. (1990) Uniparental isodisomy 6 associated with deficiency of the fourth component of complement. *J. Clin. Invest.*, **86**, 675–678.
- Robinson, D.O., Gardner, R.J., Temple, I.K., Shield, J.P.H. and Mungall, A.J. (1997) A search for an imprinted gene on chromosome 6q22–23, the overexpression of which causes transient neonatal diabetes mellitus. *Am. J. Hum. Genet.*, **61** (suppl.), A38.
- Temple, I.K., Gardner, R.J., Robinson, D.O., Kibirige, M.S., Ferguson, A.W., Baum, J.D., Barber, J.C.K., James, R.S. and Shield, J.P.H. (1996) Further evidence for an imprinted gene for neonatal diabetes localised to chromosome 6q22–q23. *Hum. Mol. Genet.*, **5**, 1117–1121.
- Arthur, E.I., Zlotogora, J., Lerer, I., Dagan, J., Marks, K. and Abeliovich, D. (1997) Transient neonatal diabetes mellitus in a child with invdup(6)(q22q23) of paternal origin. *Eur. J. Hum. Genet.*, **5**, 417–419.
- van den Berg-Loonen, E.M., Savelkoul, P., van Hooff, H., van Eede, P., Riesewijk, A. and Geraedts, J. (1996) Uniparental maternal disomy 6 in a renal transplant patient. *Hum. Immunol.*, **45**, 46–51.
- Miyoshi, N., Kuroiwa, Y., Kohda, T., Shitara, H., Yonekawa, H., Kawabe, T., Hasegawa, H., Barton, S.C., Surani, M.A., Kaneko-Ishino, T. and Ishino, F. (1998) Identification of the *Meg1/Grb10* imprinted gene on mouse proximal chromosome 11, a candidate for the Silver–Russell syndrome gene. *Proc. Natl Acad. Sci. USA*, **95**, 1102–1107.

45. Pérez Jurado, L.A., Peoples, R., Kaplan, P., Hamel, B.C.J. and Francke, U. (1996) Molecular definition of the chromosome 7 deletion in Williams syndrome and parent-of-origin effects on growth. *Am. J. Hum. Genet.*, **59**, 781–792.
46. Kobayashi, S., Kohda, T., Miyoshi, N., Kuroiwa, Y., Aisaka, K., Tsutsumi, O., Kaneko-Ishino, T. and Ishino, F. (1997) Human *PEG1/MEST*, an imprinted gene on chromosome 7. *Hum. Mol. Genet.*, **6**, 781–786.
47. Riesewijk, A.M., Hu, L., Schulz, U., Tariverdian, G., Höglund, P., Kere, J., Ropers, H.-H. and Kalscheuer, V.M. (1997) Monoallelic expression of human *PEG1/MEST* is paralleled by parent-specific methylation in fetuses. *Genomics*, **42**, 236–244.
48. Kaneko-Ishino, T., Kuroiwa, Y., Miyoshi, N., Kohda, T., Suzuki, R., Yokoyama, M., Viville, S., Barton, S.C., Ishino, F. and Surani, M.A. (1995) *Peg1/Mest* imprinted gene on chromosome 6 identified by cDNA subtraction hybridisation. *Nature Genet.*, **11**, 52–59.
49. Kotzot, D., Schmitt, S., Bernasconi, F., Robinson, W.P., Lurie, I.W., Ilyina, H., Méhes, K., Hamel, B.C.J., Otten, B.J., Hergersberg, M., Werder, E., Schoenle, E. and Schinzel, A. (1995) Uniparental disomy 7 in Silver–Russell syndrome and primordial growth retardation. *Hum. Mol. Genet.*, **4**, 583–587.
50. Langlois, S., Yong, S.L., Kwong, L.C. and Kalousek, D.K. (1995) Prenatal and postnatal growth failure associated with maternal heterodisomy for chromosome 7. *J. Med. Genet.*, **32**, 871–875.
51. Benlian, P., Foubert, L., Gagné, E., Bernard, L., De Gennes, J.L., Langlois, S., Robinson, W. and Hayden, M. (1996) Complete paternal isodisomy for chromosome 8 unmasked by lipoprotein lipase deficiency. *Am. J. Hum. Genet.*, **59**, 431–436.
52. Dobrovic, A., O’Keefe, D., Sage, R.E. and Batchelder, E. (1993) Imprinting and loss of ABO antigens in leukemia. *Blood*, **82**, 1684–1685.
53. Rachmilewitz, J., Goshen, R., Ariel, I., Schneider, T., de Groot, N. and Hochberg, A. (1992) Parental imprinting of the human H19 gene. *FEBS Lett.*, **309**, 25–28.
54. Leighton, P.A., Ingram, R.S., Eggenschwiler, J., Efstratiadis, A. and Tilghman, S.M. (1995) Disruption of imprinting caused by deletion of the H19 gene region in mice. *Nature*, **375**, 34–39.
55. Rainier, S., Johnson, L.A., Dobry, C.J., Ping, A.J., Grundy, P.E. and Feinberg, A.P. (1993) Relaxation of imprinted genes in human cancer. *Nature*, **362**, 747–749.
56. Zhang, Y. and Tycko, B. (1992) Monoallelic expression of the human H19 gene. *Nature Genet.*, **1**, 40–44.
57. Ogawa, O., Eccles, M.R., Szeto, J., McNoe, L.A., Yun, K., Maw, M.A., Smith, P.J. and Reeve, A.E. (1993) Relaxation of insulin-like growth factor II gene imprinting implicated in Wilms’ tumour. *Nature*, **362**, 749–751.
58. Ohlsson, R., Nyström, A., Pfeifer-Ohlsson, S., Töhönen, V., Hedborg, F., Schofield, P., Flam, F. and Ekstrom, T.J. (1993) *IGF2* is parentally imprinted during human embryogenesis and in the Beckwith–Wiedemann syndrome. *Nature Genet.*, **4**, 94–97.
59. Giddings, S.J., King, C.D., Harman, K.W., Flood, J.F. and Carnaghi, L.R. (1994) Allele specific inactivation of insulin 1 and 2, in the mouse yolk sac, indicates imprinting. *Nature Genet.*, **6**, 310–312.
60. Bennett, S.T., Lucassen, A.M., Gough, S.C., Powell, E.E., Undlien, D.E., Pritchard, L.E., Merriman, M.E., Kawaguchi, Y., Dronsfield, M.J., Pociot, F. et al. (1995) Susceptibility to human type 1 diabetes at *IDDM2* is determined by tandem repeat variation at the insulin gene minisatellite locus. *Nature Genet.*, **9**, 284–292.
61. Bennett, S.T., Wilson, A.J., Cucca, F., Nerup, J., Pociot, F., McKinney, P.A., Barnett, A.H., Bain, S.C. and Todd, J.A. (1996) *IDDM2-VNTR*-encoded susceptibility to type 1 diabetes: dominant protection and parental transmission of alleles of the insulin gene-linked minisatellite locus. *J. Autoimmun.*, **9**, 415–421.
62. Bennett, S.T. and Todd, J.A. (1996) Human type 1 diabetes and the insulin gene: principles of mapping polygenes. *Annu. Rev. Genet.*, **30**, 343–370.
63. Bennett, S.T., Wilson, A.J., Esposito, L., Bouzekri, N., Undlien, D.E., Cucca, G., Nistico, L., Buzzetti, R., the IMDIAB Group, Bosi, E., Pociot, F., Nerup, J., Cambon-Thomsen, A., Pugliese, A., Shield, J.P.H., McKinney, P.A., Bain, S.C., Polychronakos, C. and Todd, J.A. (1997) Insulin VNTR allele-specific effect in type 1 diabetes depends on identity of untransmitted paternal allele. *Nature Genet.*, **17**, 350–352.
64. Polychronakos, C., Giannoukakis, N. and Deal, C.L. (1995) Imprinting of *IGF2*, insulin-dependent diabetes, immune function, and apoptosis: a hypothesis. *Dev. Genet.*, **17**, 253–262.
65. Alders, M., Hodges, M., Hadjantonakis, A.-K., Postmus, J., van Wijk, I., Blied, J., de Meulemeester, M., Westerveld, A., Guillemot, F., Oudejans, C., Little, P. and Mannens, M. (1997) The human *Achaete-Scute* homologue 2 (*ASCL2*, *HASH2*) maps to chromosome 11p15.5, close to *IGF2* and is expressed in extravillous trophoblasts. *Hum. Mol. Genet.*, **6**, 859–867.
66. Guillemot, F., Caspary, T., Tilghman, S.M., Copeland, N.G., Gilbert, D.J., Jenkins, N.A., Anderson, D.J., Joyner, A.L., Rossant, J. and Nagy, A. (1995) Genomic imprinting of *Mash2*, a mouse gene required for trophoblast development. *Nature Genet.*, **9**, 235–242.
67. Guillemot, F., Nagy, A., Auerbach, A., Rossant, J. and Joyner, A.L. (1994) Essential role of *Mash-2* in extraembryonic development. *Nature*, **371**, 333–336.
68. Lee, M.P., Hu, R.-J., Johnson, L.A. and Feinberg, A.P. (1997) Human *KVLQTI* gene shows tissue-specific imprinting and encompasses Beckwith–Wiedemann syndrome chromosomal rearrangements. *Nature Genet.*, **15**, 181–185.
69. Hatada, I. and Mukai, T. (1995) Genomic imprinting of p57<sup>KIP2</sup>, a cyclin-dependent kinase inhibitor, in mouse. *Nature Genet.*, **11**, 204–206.
70. Matsuoka, S., Thompson, J.S., Edwards, M.C., Bartletta, J.M., Grundy, P., Kalikin, L.M., Harper, J.W., Elledge, S.J. and Feinberg, A.P. (1996) Imprinting of the gene encoding a human cyclin-dependent kinase inhibitor, p57<sup>KIP2</sup>, on chromosome 11p15. *Proc. Natl Acad. Sci. USA*, **93**, 3026–3030.
71. Taniguchi, T., Okamoto, K. and Reeve, A.E. (1997) Human p57<sup>KIP2</sup> defines a new imprinted domain on chromosome 11p but is not a tumour suppressor gene in Wilms tumour. *Oncogene*, **14**, 1201–1206.
72. Chung, W.Y., Yuan, L., Feng, L., Hensle, T. and Tycko, B. (1996) Chromosome 11p15.5 regional imprinting: comparative analysis of *KIP2* and *H19* in human tissues and Wilms’ tumors. *Hum. Mol. Genet.*, **5**, 1101–1108.
73. Dao, D., Frank, D., Qian, N., O’Keefe, D., Vosatka, R.J., Walsh, C.P. and Tycko, B. (1998) *IMPT1*, an imprinted gene similar to polyspecific transporter and multi-drug resistance genes. *Hum. Mol. Genet.*, **7**, 597–608.
74. Cooper, P.R., Smilnich, N.J., Day, C.D., Nowak, N.J., Reid, L.H., Pearsall, R.S., Reece, M., Prawitt, D., Landers, J., Housman, D.E., Winterpacht, A., Zabel, B.U., Pelletier, J., Weissman, B.E., Shows, T.B. and Higgins, M.J. (1998) Divergently transcribed overlapping genes expressed in liver and kidney and located in the 11p15.5 imprinted domain. *Genomics*, **49**, 38–51.
75. Schwienbacher, C., Sabbioni, S., Campi, M., Veronese, A., Bernardi, G., Menegatti, A., Hatada, I., Mukai, T., Ohashi, H., Barbanti-Brodano, G., Croce, C.M. and Negrini, M. (1998) Transcriptional map of 170-kb region at chromosome 11p15.5: identification and mutational analysis of the *BWR1A* gene reveals the presence of mutations in tumor samples. *Proc. Natl Acad. Sci. USA*, **95**, 3873–3878.
76. Lee, M.P. and Feinberg, A.P. (1998) Genomic imprinting of a human apoptosis gene homologue, *TSSC3*. *Cancer Res.*, **58**, 1052–1056.
77. Qian, N., Frank, D., O’Keefe, D., Dao, D., Zhao, L., Yuan, L., Wang, Q., Keating, M., Walsh, C. and Tycko, B. (1997) The *IP1* gene on chromosome 11p15.5 is imprinted in humans and mice and is similar to *TDAG51*, implicated in Fas expression and apoptosis. *Hum. Mol. Genet.*, **6**, 2021–2029.
78. Jinno, Y., Yun, K., Nishiwaki, K., Kubota, T., Ogawa, O., Reeve, A.E. and Niikawa, N. (1994) Mosaic and polymorphic imprinting of the *WT1* gene in humans. *Nature Genet.*, **6**, 305–309.
79. Mitsuya, K., Sui, H., Meguro, M., Kugoh, H., Jinno, Y., Niikawa, N. and Oshimura, M. (1997) Paternal expression of *WT1* in human fibroblasts and lymphocytes. *Hum. Mol. Genet.*, **6**, 2243–2246.
80. Shirakawa, T., Li, A., Dubowitz, M., Dekker, J.W., Shaw, A.E., Faux, J.A., Ra, C., Cookson, W.O.C.M. and Hopkin, J.M. (1994) Association between atopy and variants of the  $\beta$  subunit of the high-affinity immunoglobulin E receptor. *Nature Genet.*, **7**, 125–129.
81. Baysal, B.E., Farr, J.E., Rubinstien, W.S., Galus, R.A., Johnson, K.A., Aston, C.E., Myers, E.N., Johnson, J.T., Carrau, R., Kirkpatrick, S.J., Mysiorek, D., Singh, D., Saha, S., Gollin, S.M., Evans, G.A., James, M.R. and Richard, C.R. III (1997) Fine mapping of an imprinted gene for familial nonchromaffin paragangliomas, on chromosome 11q23. *Am. J. Hum. Genet.*, **60**, 121–132.
82. Mariman, E.C.M., van Beersum, S.E.C., Cremers, C.W.R.J., Struycken, P.M. and Ropers, H.H. (1995) Fine mapping of a putatively imprinted gene for familial non-chromaffin paragangliomas to chromosome 11q13.1: evidence for genetic heterogeneity. *Hum. Genet.*, **95**, 56–62.
83. van der Mey, A.G.L., Maaswinkel-Mooy, P.D., Cornelisse, C.J., Schmidt, P.H. and van de Kamp, J.J.P. (1989) Genomic imprinting in hereditary glomus tumours: evidence for new genetic theory. *Lancet*, **2**, 1291–1294.
84. Milunsky, J., DeStefano, A.L., Huang, X.-L., Baldwin, C.T., Michels, V.V., Jako, G. and Milunsky, A. (1997) Familial paragangliomas: linkage to chromosome 11q23 and clinical implications. *Am. J. Med. Genet.*, **72**, 66–70.
85. Naumova, A. and Sapienza, C. (1994) The genetics of retinoblastoma, revisited. *Am. J. Hum. Genet.*, **54**, 264–273.
86. Nikitin, A.Y., Riley, D.J. and Lee, W.-H. (1997) Earlier onset of melanotroph carcinogenesis in mice with inherited mutant paternal allele of the retinoblastoma gene. *Cancer Res.*, **57**, 4274–4278.
87. Blanquet, V., Turleau, C., de Grouchy, J. and Creau-Goldberg, N. (1991) Physical map around the retinoblastoma gene: possible genomic imprinting suggested by *NruI* digestion. *Genomics*, **10**, 350–355.



88. Kato, M.V., Shimizu, T., Nagayoshi, M., Kaneko, A., Sasaki, M.S. and Ikawa, Y. (1996) Genomic imprinting of the human serotonin-receptor (*HTR2*) gene involved in development of retinoblastoma. *Am. J. Hum. Genet.*, **59**, 1084–1090.
89. Robin, N.H., Harari-Shacham, A., Schwartz, S. and Wolff, D.J. (1997) Duplication 14(q24.3q31) in a father and daughter: delineation of a possible imprinted region. *Am. J. Med. Genet.*, **71**, 361–365.
90. Tomkins, D.J., Roux, A.-F., Waye, J., Freeman, V.C.P., Cox, D.W. and Whelan, D.T. (1996) Maternal uniparental isodisomy of human chromosome 14 associated with a paternal t(13q14q) and precocious puberty. *Eur. J. Hum. Genet.*, **4**, 153–159.
91. Walter, C.A., Shaffer, L.G., Kaye, C.I., Huff, R.W., Ghidoni, P.D., McCaskill, C., McFarland, M.B. and Moore, C.M. (1996) Short-limb dwarfism and hypertrophic cardiomyopathy in a patient with paternal isodisomy 14:45,XY,idelc(14)(p11). *Am. J. Med. Genet.*, **65**, 259–265.
92. Cotter, P.D., Kaffe, S., McCurdy, L.D., Jhaveri, M., Willner, J.P. and Hirschhorn, K. (1997) Paternal uniparental disomy for chromosome 14: a case report and review. *Am. J. Med. Genet.*, **70**, 74–79.
93. Glenn, C.C., Driscoll, D.J., Yang, T.P. and Nicholls, R.D. (1997) Genomic imprinting: potential function and mechanisms revealed by the Prader–Willi and Angelman syndromes. *Mol. Hum. Reprod.*, **3**, 321–332.
94. Glenn, C.C., Nicholls, R.D., Robinson, W.P., Saitoh, S., Niikawa, N., Schinzel, A., Horsthemke, B. and Driscoll, D.J. (1993) Modification of 15q11–q13 DNA methylation imprints in unique Angelman and Prader–Willi patients. *Hum. Mol. Genet.*, **2**, 1377–1382.
95. Driscoll, D.J., Waters, M.F., Williams, C.A., Zori, R.T., Glenn, C.C., Avidano, K.M. and Nicholls, R.D. (1992) A DNA methylation imprint, determined by the sex of the parent, distinguishes the Angelman and Prader–Willi syndromes. *Genomics*, **13**, 917–924.
96. MacDonald, H.R. and Wevrick, R. (1997) The necdin gene is deleted in Prader–Willi syndrome and is imprinted in human and mouse. *Hum. Mol. Genet.*, **6**, 1873–1878.
97. Jay, P., Rougeulle, C., Massacrier, A., Moncla, A., Mattei, M.-G., Malzac, P., Roëckel, N., Taviaux, S., Lefranc, J.-L.B., Cau, P., Berta, P., Lalande, M. and Muscatelli, F. (1997) The human necdin gene, *NDN*, is maternally imprinted and located in the Prader–Willi syndrome chromosomal region. *Nature Genet.*, **17**, 357–361.
98. Watrin, F., Roëckel, N., Lacriox, L., Mignon, C., Mattei, M.-G., Disteche, C. and Muscatelli, F. (1997) The mouse *Necdin* gene is expressed from the paternal allele only and lies in the 7C region of the mouse chromosome 7, a region of conserved synteny to the human Prader–Willi syndrome region. *Eur. J. Hum. Genet.*, **5**, 324–332.
99. Dittrich, B., Buiting, K., Korn, B., Rickard, S., Buxton, J., Saitoh, S., Nicholls, R.D., Poustka, A., Winterpacht, A., Zabel, B. and Horsthemke, B. (1996) Imprint switching on human chromosome 15 may involve alternative transcripts of the *SNRPN* gene. *Nature Genet.*, **14**, 163–170.
100. Ning, Y., Roschke, A., Christian, S.L., Lesser, J., Sutcliffe, J.S. and Ledbetter, D.H. (1996) Identification of a novel paternally expressed transcript adjacent to *snRPN* in the Prader–Willi syndrome critical region. *Genome Res.*, **6**, 742–746.
101. Saitoh, S., Buiting, K., Rogan, P.K., Buxton, J.L., Driscoll, D.J., Arnemann, J., König, R., Malcolm, S., Horsthemke, B. and Nicholls, R.D. (1996) Minimal definition of the imprinting center and fixation of a chromosome 15q11–q13 epigenotype by imprinting mutations. *Proc. Natl Acad. Sci. USA*, **93**, 7811–7815.
102. Glenn, C.C., Porter, K.A., Jong, M.T.C., Nicholls, R.D. and Driscoll, D.J. (1993) Functional imprinting and epigenetic modification of the human *SNRPN* gene. *Hum. Mol. Genet.*, **2**, 2001–2005.
103. Sutcliffe, J.S., Nakao, M., Christian, S., Örstavik, K.H., Tommerup, N., Ledbetter, D.H. and Beaudet, A.L. (1994) Deletions of a differentially methylated CpG island at the *SNRPN* gene define a putative imprinting control region. *Nature Genet.*, **8**, 52–58.
104. Wevrick, R., Kerns, J.A. and Francke, U. (1994) Identification of a novel paternally expressed gene in the Prader–Willi syndrome region. *Hum. Mol. Genet.*, **3**, 1877–1882.
105. Rougeulle, C., Glatt, H. and Lalande, M. (1997) The Angelman syndrome candidate gene, *UBE3A/E6-AP*, is imprinted in brain. *Nature Genet.*, **17**, 14–15.
106. Vu, T.H. and Hoffman, A.R. (1997) Imprinting of the Angelman syndrome gene, *UBE3A*, is restricted to brain. *Nature Genet.*, **17**, 12–13.
107. Meguro, M., Mitsuya, K., Sui, H., Shigenami, K., Kugoh, H., Nakao, M. and Oshimura, M. (1997) Evidence for uniparental, paternal expression of the human GABA<sub>A</sub> receptor subunit genes, using microcell-mediated chromosome transfer. *Hum. Mol. Genet.*, **6**, 2127–2133.
108. Cook, E.H. Jr, Lindgren, V., Leventhal, B.L., Courchesne, R., Lincoln, A., Shulman, C., Lord, C. and Courchesne, E. (1997) Autism or atypical autism in maternally but not paternally derived proximal 15q duplication. *Am. J. Hum. Genet.*, **60**, 928–934.
109. Kim, J., Ashworth, L., Branscomb, E. and Stubbs, L. (1997) The human homolog of a mouse-imprinted gene, *Peg3*, maps to a zinc finger gene-rich region of human chromosome 19q13.4. *Genome Res.*, **7**, 532–540.
110. Williamson, C.M., Schofield, J., Dutton, E.R., Seymour, A., Beechey, C.V., Edwards, Y.H. and Peters, J. (1996) Glomerular-specific imprinting of the mouse *Gs-α* gene—how does this relate to hormone resistance in Albright hereditary osteodystrophy. *Genomics*, **36**, 280–287.
111. Davies, S.J. and Hughes, H.E. (1993) Imprinting in Albright's hereditary osteodystrophy. *J. Med. Genet.*, **30**, 101–103.
112. Campbell, R., Gosden, C.M. and Bonthron, D.T. (1994) Parental origin of transcription of the human *GNAS1* gene. *J. Med. Genet.*, **31**, 607–614.
113. Schinzel, A.A., Basaran, S., Bernasconi, F., Karaman, B., Yüksel-Apak, M. and Robinson, W.P. (1994) Maternal uniparental disomy 22 has no impact on the phenotype. *Am. J. Hum. Genet.*, **54**, 21–24.
114. Goto, T., Wright, E. and Monk, M. (1997) Paternal X-chromosome inactivation in human trophoblastic cells. *Mol. Hum. Reprod.*, **3**, 77–80.
115. Takagi, N. and Sasaki, M. (1975) Preferential inactivation of the paternal derived X chromosome in the extraembryonic membranes of the mouse. *Nature*, **256**, 640–642.
116. Brown, C.J., Ballabio, A., Rupert, J.L., Lafreniere, R.G., Grompe, M., Tonlorenzi, R. and Willard, H.F. (1991) A gene from the region of the human X inactivation centre is expressed exclusively from the inactive X chromosome. *Nature*, **349**, 38–44.
117. Kay, G.F., Barton, S.C., Surani, M.A. and Rastan, S. (1994) Imprinting and X chromosome counting mechanisms determine *Xist* expression in early mouse development. *Cell*, **77**, 639–650.
118. Skuse, D.H., James, R.S., Bishop, D.V.M., Coppin, B., Dalton, P., Aamodt-Leeper, G., Bacarese-Hamilton, M., Creswell, C., McGurk, R. and Jacobs, P.A. (1997) Evidence from Turner's syndrome of an imprinted X-linked locus affecting cognitive function. *Nature*, **387**, 705–708.
119. Chu, C.E., Donaldson, M.D.C., Kelnar, C.J.H., Smail, P.J., Greene, S.A., Paterson, W.F. and Connor, J.M. (1994) Possible role of imprinting in the Turner phenotype. *J. Med. Genet.*, **31**, 840–842.
120. Quan, F., Janas, J., Toth-Fejel, S., Johnson, D.B., Wolford, J.K. and Popovich, B.W. (1997) Uniparental disomy of the entire X chromosome in a female with Duchenne muscular dystrophy. *Am. J. Hum. Genet.*, **60**, 160–165.
121. Schinzel, A.A., Robinson, W.P., Binkert, F., Torresani, T. and Werder, E.A. (1993) Exclusively paternal X chromosomes in a girl with short stature. *Hum. Genet.*, **92**, 175–178.
122. Peretz, H., Luboshitsky, R., Baron, E., Biton, A., Gershoni, R., Usher, S., Grynberg, E., Yakobson, E., Graff, E. and Lapidot, M. (1997) Cys 618 Arg mutation in the *RET* proto-oncogene associated with familial medullary thyroid carcinoma and maternally transmitted Hirschsprung's disease suggesting a role for imprinting. *Hum. Mutat.*, **10**, 155–159.
123. Evans, D.G., Huson, S.M., Donnai, D., Neary, W., Blair, V., Teare, D., Newton, V., Strachan, T., Ramsden, R. and Harris, R. (1992) A genetic study of type 2 neurofibromatosis in the United Kingdom. I. Prevalence, mutation rate, fitness, and confirmation of maternal transmission effect on severity. *J. Med. Genet.*, **29**, 841–846.
124. Miller, M. and Hall, J.G. (1978) Possible maternal effects on severity of neurofibromatosis. *Lancet*, **i**, 1071–1073.
125. Crow, T.J., DeLisi, L.E. and Johnstone, E.C. (1989) Concordance by sex in sibling pairs with schizophrenia is paternally inherited. Evidence for a pseudoautosomal locus. *Br. J. Psychiatr.*, **155**, 92–97.
126. Ohara, K., Xu, H.-D., Mori, N., Suzuki, T., Xu, D.-S., Ohara, K. and Wang, Z.-C. (1997) Anticipation and imprinting in schizophrenia. *Biol. Psychiatr.*, **42**, 760–766.
127. O'Donovan, M.C., Guy, C., Craddock, N., Murphy, K.C., Cardno, A.G., Jones, L.A., Owen, M.J. and McGuffin, P. (1995) Expanded CAG repeats in schizophrenia and bipolar disorder. *Nature Genet.*, **10**, 380–381.
128. Asherson, P., Walsh, C., Williams, J., Sargeant, M., Taylor, C., Clements, A., Gill, M., Owen, M. and McGuffin, P. (1994) Imprinting and anticipation. Are they relevant to genetic studies of schizophrenia? *Br. J. Psychiatr.*, **164**, 619–624.
129. Oruc, L., Lindblad, K., Verheyen, G.R., Ahlberg, S., Jakovljevic, M., Ivezic, S., Raeymaekers, P., van Broeckhoven, C. and Schalling, M. (1997) CAG repeat expansions in bipolar and unipolar disorders. *Am. J. Hum. Genet.*, **60**, 730–732.
130. Grigoriou-Serbanescu, M. (1993) Genomic imprinting and fragile X-syndrome in psychiatric disorders. *Romanian J. Neurol. Psychiatr.*, **31**, 3–10.

131. Grigoriou-Serbanescu, M., Nothen, M., Propping, P., Poustka, F., Magureau, S., Vasilescu, R., Marinescu, E., and Ardelean, V. (1995) Clinical evidence for genomic imprinting in bipolar I disorder. *Acta Psychiatr. Scand.*, **92**, 365–370.
132. Grigoriou-Serbanescu, M., Wickramaratne, P.J., Hodge, S.E., Milea, S. and Mihailescu, R. (1997) Genetic anticipation and imprinting in bipolar I illness. *Br. J. Psychiatr.*, **170**, 162–166.
133. McMahon, F.J., Stine, O.C., Meyers, D.A., Simpson, S.G. and DePaulo, J.R. (1995) Patterns of maternal transmission in bipolar affective disorder. *Am. J. Hum. Genet.*, **56**, 1277–1286.
134. Stine, O.C., Xu, J., Koskela, R., McMahon, F.J., Gschwend, M., Friddle, C., Clark, C.D., McInnis, M.G., Simpson, S.G., Breschel, T.S. *et al.* (1995) Evidence for linkage of bipolar disorder to chromosome 18 with a parent-of-origin effect. *Am. J. Hum. Genet.*, **57**, 1384–1394.
135. Kato, T., Winokur, G., Coryell, W., Keller, M.B., Endicott, J. and Rice, J. (1996) Parent-of-origin effect in transmission of bipolar disorder. *Am. J. Med. Genet.*, **67**, 546–550.
136. Saraiva, J.M. (1997) Progressive diaphyseal dysplasia: a three-generation family with markedly variable expressivity. *Am. J. Med. Genet.*, **71**, 348–352.
137. de Die-Smulders, C., Thuenissen, P., Schrander-Stumpel, C. and Frijns, J.P. (1992) On the variable expression of the Brachmann-de Lange syndrome. *Clin. Genet.*, **41**, 42–45.
138. Clarke, L.A., Elstein, E., Sole, M.J. and Hayden, M.R. (1992) Genomic imprinting in a family with dominant hypertrophic cardiomyopathy. *Am. J. Hum. Genet.*, **51** (suppl. 4), abstract 358.
139. Chatkupt, S.S., Lucek, P.R., Koenigsberger, M.R. and Johnson, W.G. (1992) Parental sex effect in spina bifida: a role for genomic imprinting. *Am. J. Med. Genet.*, **44**, 508–512.
140. Traupe, H., van Gurp, P.J.M., Happel, R., Boezeman, J. and van de Kerkhof, P.C.M. (1992) Psoriasis vulgaris, fetal growth, and genomic imprinting. *Am. J. Med. Genet.*, **42**, 649–654.
141. Lichter, D.G., Jackson, L.A. and Schachter, M. (1995) Clinical evidence of genomic imprinting in Tourette's syndrome. *Neurology*, **45**, 924–928.
142. Eapen, V., O'Neill, J., Gurling, H.M.D. and Robertson, M.M. (1997) Sex of parent transmission effect in Tourette's syndrome: evidence for earlier age at onset in maternally transmitted cases suggests a genomic imprinting effect. *Neurol.*, **48**, 934–937.
143. Caron, C., Brassard, A. and Mérette, C. (1997) Genomic imprinting in Tourette's syndrome. *Neurology*, **49**, 637–638.
144. Zerres, K. and Rudnik-Schoneborn, S. (1995) On genetic heterogeneity, anticipation and imprinting in polycystic kidney diseases. *Nephrol. Dial. Transplant.*, **10**, 7–9.
145. Torra, R., Badenas, C., Darnell, A., Nicolau, C., Volpini, V., Revert, L. and Estivill, X. (1998) Clinical, genetic and molecular studies on autosomal dominant polycystic kidney disease. *Medicina Clinica*, **110**, 481–487.
146. Akolkar, P.N., Gulwani-Akolkar, B., Heresbach, D., Lin, X.Y., Fisher, S., Katz, S. and Silver, J. (1997) Differences in risk of Crohn's disease in offspring of mothers and fathers with inflammatory bowel disease. *Am. J. Gastro.*, **92**, 2241–2244.
147. Ottman, R., Annegers, J.F., Hauser, W.A. and Kurland, L.T. (1988) Higher risk of seizures in offspring of mothers than of fathers with epilepsy. *Am. J. Hum. Genet.*, **43**, 257–264.
148. Kagitani, F., Kuroiwa, Y., Wakana, S., Shiroishi, T., Miyoshi, N., Kobayashi, S., Nishida, M., Kohda, T., Kaneko-Ishino, T. and Ishino, F. (1997) *Peg5/neuronatin* is an imprinted gene located on sub-distal chromosome 2 in the mouse. *Nucleic Acids Res.*, **25**, 3428–3432.
149. Kikyo, N., Williamson, C.M., John, R.M., Barton, S.C., Beechey, C.V., Ball, S.T., Cattanaach, B.M., Surani, M.A. and Peters, J. (1997) Genetic and functional analysis of *neuronatin* in mice with maternal or paternal duplication of distal Chr 2. *Dev. Biol.*, **190**, 66–77.
150. Kuroiwa, Y., Kaneko-Ishino, T., Kagitani, F., Kohda, T., Li, L.-L., Tada, M. and Suzuki, R. (1996) *Peg3* imprinted gene on proximal chromosome 7 encodes for a zinc finger protein. *Nature Genet.*, **12**, 186–190.
151. Banko, M.L., Allen, K.M., Dolina, S., Neumann, P.E. and Seyfried, T.N. (1997) Genomic imprinting and audiogenic seizures in mice. *Behav. Genet.*, **27**, 465–475.
152. Leff, S.E., Brannan, C.I., Reed, M.L., Özçelik, T., Francke, U., Copeland, N.G. and Jenkins, N.A. (1992) Maternal imprinting of the mouse *Snrpn* gene and conserved linkage homology with the human Prader-Willi syndrome region. *Nature Genet.*, **2**, 259–264.
153. Wevrick, R. and Francke, U. (1997) An imprinted mouse transcript homologous to the human imprinted in Prader-Willi syndrome (*IPW*) gene. *Hum. Mol. Genet.*, **6**, 325–332.
154. Albrecht, U., Sutcliffe, J.S., Cattanaach, B.M., Beechey, C.V., Armstrong, D., Eichele, G. and Beaudet, A.L. (1997) Imprinted expression of the murine Angelman syndrome gene, *Ube3a*, in hippocampal and Purkinje neurons. *Nature Genet.*, **17**, 75–78.
155. Gould, T.D. and Pfeifer, K. (1998) Imprinting of mouse *Kvlqt1* is developmentally regulated. *Hum. Mol. Genet.*, **7**, 483–487.
156. Toder, R., Wilcox, S.A., Smithwick, M. and Graves, J.A.M. (1996) The human/mouse imprinted genes *IGF2*, *H19*, *SNRPN* and *ZNF127* map to two conserved autosomal clusters in a marsupial. *Chromosome Res.*, **4**, 295–300.
157. Plass, C., Shibata, H., Kalcheva, I., Mullins, L., Kotelevtseva, N., Mullins, J., Kato, R., Sasaki, H., Hirotsune, S., Okazaki, Y., Held, W.A., Hayashizaki, Y. and Chapman, V.M. (1996) Identification of *Grf1* on mouse chromosome 9 as an imprinted gene by RLGS-M. *Nature Genet.*, **14**, 106–109.
158. Hatada, I., Sugama, T. and Mukai, T. (1993) A new imprinted gene cloned by a methylation-sensitive genome scanning method. *Nucleic Acids Res.*, **21**, 5577–5582.
159. Hayashizaki, Y., Shibata, H., Hirotsune, S., Sugino, H., Okazaki, Y., Sasaki, N., Hirose, K., Imoto, H., Okuizumi, H., Muramatsu, M., Komatsubara, H., Shiroishi, T., Moriwaki, K., Katsuki, M., Hatano, N., Sasaki, H., Ueda, T., Mise, N., Takagi, N., Plass, C. and Chapman, V.M. (1994) Identification of an imprinted U2af binding protein related sequence on mouse chromosome 11 using the RLGS method. *Nature Genet.*, **6**, 33–34.
160. Schuster-Gossler, K., Simon-Chazottes, D., Guenet, J.L., Zachgo, J. and Gossler, A. (1996) *Gtl2<sup>lacZ</sup>*, an insertional mutation on mouse chromosome 12 with parental origin-dependent phenotype. *Mamm. Genome*, **7**, 20–24.
161. Kato, M.V., Ikawa, Y., Hayashizaki, Y. and Shibata, H. (1998) Paternal imprinting of mouse serotonin receptor 2a gene *Htr2* in embryonic eye: a conserved imprinting regulation on the Rb/Rb locus. *Genomics*, **47**, 146–148.
162. Villar, A.J. and Pedersen, R.A. (1994) Parental imprinting of the *Mas* protooncogene in mouse. *Nature Genet.*, **8**, 373–379.
163. Schweifer, N., Valk, P.J.M., Delwel, R., Cox, R., Francis, F., Meier-Ewert, S., Lehrach, H. and Barlow, D.P. (1997) Characterization of the C3 YAC contig from proximal mouse chromosome 17 and analysis of allelic expression of genes flanking the imprinted *Igf2r* gene. *Genomics*, **43**, 285–297.
164. Hagiwara, Y., Hirai, M., Nishiyama, K., Kanazawa, I., Ueda, T., Sakaki, Y. and Ito, T. (1997) Screening for imprinted genes by allelic message display: identification of a paternally expressed gene *Impact* on mouse chromosome 18. *Proc. Natl Acad. Sci. USA*, **94**, 9249–9254.
165. Oakey, R.J., Matteson, P.G., Litwin, S., Tilghman, S.M. and Nussbaum, R.L. (1995) Nondisjunction rates and abnormal embryonic development in a mouse cross between heterozygotes carrying a (7,18) Robertsonian translocation chromosome. *Genetics*, **141**, 667–674.
166. Deltour, L., Montagutelli, X., Guenet, J.-L., Jami, J. and Páldi, A. (1995) Tissue- and developmental stage-specific imprinting of the mouse proinsulin gene. *Ins2. Dev. Biol.*, **168**, 686–688.
167. West, J.D., Frels, W.L., Chapman, V.M. and Papaioannou, V.E. (1977) Preferential expression of the maternally derived X chromosome in the mouse yolk sac. *Cell*, **12**, 873–882.
168. Bittner, R.E., Popoff, I., Shorny, S., Höger, H. and Wachtler, F. (1997) Dystrophin expression in heterozygous *mdx*<sup>+</sup> mice indicates imprinting of X chromosome inactivation by parent-of-origin-, tissue-, strain- and position-dependent factors. *Anat. Embryol.*, **195**, 175–182.
169. Beamer, W.G., Shultz, K.L., Tennent, B.J., Nadeau, J.H., Churchill, G.A. and Eicher, E.M. (1998) Multigenic and imprinting control of ovarian granulosa cell tumorigenesis in mice. *Cancer Res.*, in press.
170. Dawson, W.D. (1965) Fertility and size inheritance in a *Peromyscus* species cross. *Evolution*, **19**, 44–55.
171. York, B., Lei, K. and West, D.B. (1997) Inherited non-autosomal effects on body fat in F<sub>2</sub> mice derived from an AKR/J×SWR/J cross. *Mamm. Genome*, **8**, 726–730.
172. Peters, J. and Ball, S.T. (1990) Parental influences on expression of glucose-6-phosphate dehydrogenase, *G6pd*, in the mouse; a case of imprinting. *Genet. Res.*, **56**, 245–252.
173. McDonald, T.P. and Jackson, C.W. (1994) The role of genotype, genomic imprinting, and sex hormones in platelet and megakaryocyte production. *Exp. Hematol.*, **22**, 959–966.
174. Bander, S.A.A., Watson, S.C. and Shire, J.G.M. (1989) Paternal inheritance of egg traits in mice: a case of genomic imprinting. *Genet. Res., Camb.*, **54**, 213–219.
175. Kanbour-Shakir, A., Zhang, X., Rouleau, A., Armstrong, D.T., Kunz, H.W., Macpherson, T.A. and Gill, T.J. III (1990) Gene imprinting and major histocompatibility complex class I antigen expression in the rat placenta. *Proc. Natl Acad. Sci. USA*, **87**, 444–448.

176. Kanbour-Shakir, A., Kunz, H.W. and Gill, T.J. III (1993) Differential genomic imprinting of major histocompatibility complex class I antigens in the placenta of the rat. *Biol. Reprod.*, **48**, 977–986.
177. Kanbour-Shakir, A., Armstrong, D.T., Rouleau, A., Kunz, H.W. and Gill, T.J. III (1995) Seminal fluid and the expression of MHC class I antigens in the placenta of the rat. *Am. J. Reprod. Immunol.*, **33**, 367–372.
178. Chaillet, J.R. (1992) DNA methylation and genomic imprinting in the mouse. *Dev. Biol.*, **3**, 99–105.
179. Allen, N.D. and Mooslehner, K.A. (1992) Imprinting, transgene methylation and genotype-specific modification. *Semin. Dev. Biol.*, **3**, 87–98.
180. Stewart, F. and Allen, W.R. (1981) Biological functions and receptor binding activities of equine chorionic gonadotrophins. *J. Reprod. Fert.*, **62**, 527–536.
181. de Groot, N., Goshen, R., Rachmilewitz, J., Gonik, B., Ben-Hur, H. and Hochberg, A. (1993) Genomic imprinting and b-chorionic gonadotropin. *Prenatal Diagn.*, **13**, 1159–1160.
182. Haig, D. (1993) Genomic imprinting, human chorionic gonadotropin, and triploidy. *Prenatal Diagn.*, **13**, 151.
183. Goshen, R., Gonik, B., de Groot, N. and Hochberg, A.A. (1994) The genomic basis of the  $\beta$ -subunit of human chorionic gonadotropin diversity in triploidy. *Am. J. Obstet. Gynecol.*, **170**, 700–701.
184. Hyland, A. (1990) *Equus, The Horse in the Roman World*. Yale University Press, New Haven, CT.
185. Chandley, A.C. (1989) Why don't the mule and hinny look alike? *Mule Quart. J. Br. Mule Soc.*, **43**, 7–10.
186. Georges, M. and Cockett, N. (1996) The ovine *callipyge* locus: a paradigm illustrating the importance of non-Mendelian genetics in livestock. *Reprod. Nutr. Dev.*, **36**, 651–657.
187. Castro-Sierra, E. and Ohno, S. (1968) Allelic inhibition at the autosomally inherited gene locus for alcohol dehydrogenase in chicken-quail hybrids. *Biochem. Genet.*, **1**, 323–335.
188. Elinson, R.P. (1977) Macrocephaly and microcephaly in hybrids between the bullfrog *Rana catesbeiana* and the mink frog *Rana septentrionalis* (Amphibia, Anura, Ranidae). *J. Herpetol.*, **11**, 94–96.
189. Klose, J. and Wolf, U. (1970) Transitional hemizyosity of the maternally derived allele at the 6PGD locus during early development of the cyprinid fish *Rutilus rutilus*. *Biochem. Genet.*, **4**, 87–92.
190. Schmidtke, J., Kuhl, P. and Engel, W. (1976) Transitory hemizyosity of paternally derived alleles in hybrid trout embryos. *Nature*, **260**, 319–320.
191. Whitt, G.S., Cho, P.L. and Childers, W.F. (1972) Preferential inhibition of allelic isozyme synthesis in an interspecific sunfish hybrid. *J. Exp. Zool.*, **179**, 271–282.
192. Whitt, G.S., Childers, W.F. and Cho, P.L. (1973) Allelic expression at enzyme loci in an intertribal hybrid sunfish. *J. Hered.*, **64**, 55–61.
193. Martin, C.C. and McGowan, R. (1995) Parent-of-origin specific effects on the methylation of a transgene in the zebrafish (*Danio rerio*). *Dev. Genet.*, **17**, 233–239.
194. Corley-Smith, G.E., Lim, C.J. and Brandhorst, B.P. (1996) Production of androgenetic zebrafish (*Danio rerio*). *Genetics*, **142**, 1265–1276.
195. Spofford, J.B. (1959) Parental control of position-effect variegation: I. Parental heterochromatin and expression of the White locus in compound-X *Drosophila melanogaster*. *Proc. Natl Acad. Sci. USA*, **45**, 1003–1007.
196. Laible, G., Wolf, A., Dorn, R., Reuter, G., Nislow, C., Lebersorger, A., Popkin, D., Pillus, L. and Jenuwein, T. (1997) Mammalian homologues of the *Polycomb*-group gene *Enhancer of zeste* mediate gene silencing in *Drosophila* heterochromatin and at *S.cerevisiae* telomeres. *EMBO J.*, **16**, 3219–3232.
197. Dorn, R., Krauss, V., Reuter, G. and Saumweber, H. (1993) The enhancer of position-effect variegation of *Drosophila*, *E(var)3-93D*, codes for a chromatin protein containing a conserved domain common to several transcriptional regulators. *Proc. Natl Acad. Sci. USA*, **90**, 11376–11380.
198. Bishop, C.P. and Jackson, C.M. (1996) Genomic imprinting of chromatin in *Drosophila melanogaster*. *Genetica*, **97**, 33–37.
199. Dobson, S.L. and Tanouye, M.A. (1998) Evidence for a genomic imprinting sex determination mechanism in *Nasonia vitripennis* (Hymenoptera; Chalcidoidea). *Genetics*, **149**, 233–242.
